# Supplementary material for: MicroRNA Let-7a, -7e and -133a Attenuate Hypoxia-Induced Atrial Fibrosis via Targeting Collagen Expression and the JNK Pathway in HL1 Cardiomyocytes
Source: MDPI journal article supplement (doi:10.3390/ijms23179636), 2022-08-25
Supplement: s1 [file s1]

**Table S1.** List of differentially expressed miRNAs in hypoxic HL-1 myocyte detected by miRNA microarray assay

| miRNA             | Hyp/CTL (log2) | miRNA           | Hyp/CTL (log2) |
|-------------------|----------------|-----------------|----------------|
| mmu-miR-5099      | -0.77          | mmu-miR-2137    | 0.30           |
| mmu-let-7e-5p     | -0.69          | mmu-miR-1983    | 0.30           |
| mmu-miR-669d-5p   | -0.68          | mmu-miR-711     | 0.31           |
| mmu-miR-5117-3p   | -0.65          | mmu-miR-3474    | 0.31           |
| mmu-miR-5129-5p   | -0.62          | mmu-miR-694     | 0.32           |
| mmu-miR-1949      | -0.59          | mmu-miR-210-3p  | 0.33           |
| mmu-miR-669a-3p   | -0.58          | mmu-miR-1931    | 0.33           |
| mmu-miR-466f      | -0.58          | mmu-miR-494-3p  | 0.33           |
| mmu-miR-193b-5p   | -0.56          | mmu-miR-700-3p  | 0.34           |
| mmu-let-7a-5p     | -0.53          | mmu-miR-346-3p  | 0.35           |
| mmu-miR-3082-5p   | -0.53          | mmu-miR-375-5p  | 0.38           |
| mmu-miR-669c-3p   | -0.52          | mmu-miR-1894-3p | 0.47           |
| mmu-miR-125b-1-3p | -0.50          | mmu-miR-1199-3p | 0.52           |
|                   |                | mmu-miR-5112    | 0.60           |
|                   |                | mmu-miR-883a-3p | 0.62           |

**Table S2.** Top 10 important pathways of differentially expressed miRNAs

| pathway                    | p-value     | miRNA numbers |
|----------------------------|-------------|---------------|
| TGF-beta signaling pathway | 7.77E-05    | 12            |
| FoxO signaling pathway     | 7.77E-05    | 14            |
| Hippo signaling pathway    | 0.000214221 | 14            |
| ECM-receptor interaction   | 0.001298154 | 9             |
| cGMP-PKG signaling pathway | 0.002014296 | 16            |
| Circadian rhythm           | 0.002929838 | 10            |
| mTOR signaling pathway     | 0.002929838 | 12            |
| AMPK signaling pathway     | 0.003042452 | 14            |
| Oxytocin signaling pathway | 0.003042452 | 16            |
| MAPK signaling pathway     | 0.013806268 | 18            |
